# Supplementary material
Source: publisher figshare collection journal article supplement (https://karger.figshare.com/ndownloader/files/13023752)
Supplement: Supplementary file 1 [file 13023752]

*PC Loadings of Environmental PCA Variables*

**Supplementary Table 1**. Statistics and PC loadings from a PCA analysis of 20 environmental variables.

| **Variable** | **PC1** | **PC2** | **PC3** |
| --- | --- | --- | --- |
| **Aridity** | -0.268 | -0.029 | 0.081 |
| **Bio1 (Annual Mean Temperature)** | 0.072 | 0.418 | 0.249 |
| **Bio2 (Mean Diurnal Range)** | 0.246 | 0.162 | -0.171 |
| **Bio3 (Isothermality)** | -0.128 | 0.247 | -0.662 |
| **Bio4 (Temperature Seasonality)** | 0.265 | 0.052 | 0.130 |
| **Bio5 (Max Temperature of Warmest Month)** | 0.240 | 0.192 | 0.149 |
| **Bio6 (Min Temperature of Coldest Month)** | -0.253 | 0.086 | 0.282 |
| **Bio7 (Temperature Annual Range** | 0.263 | 0.100 | -0.003 |
| **Bio8 (Mean Temperature of Wettest Quarter)** | 0.203 | 0.272 | 0.224 |
| **Bio9 (Mean Temperature of Driest Quarter)** | -0.156 | 0.341 | 0.102 |
| **Bio10 (Mean Temperature of Warmest Quarter)** | 0.205 | 0.265 | 0.271 |
| **Bio11 (Mean Temperature of Coldest Quarter)** | -0.179 | 0.329 | 0.144 |
| **Bio12 (Annual Precipitation)** | -0.264 | 0.089 | 0.039 |
| **Bio13 (Precipitation of Wettest Month)** | -0.242 | 0.183 | -0.030 |
| **Bio14 (Precipitation of Driest Month)** | -0.236 | -0.180 | 0.125 |
| **Bio15 (Precipitation Seasonality** | -0.063 | 0.412 | -0.327 |
| **Bio16 (Precipitation of Wettest Quarter)** | -0.245 | 0.183 | -0.015 |
| **Bio17 (Precipitation of Driest Quarter)** | -0.257 | -0.076 | 0.161 |
| **Bio18 (Precipitation of Warmest Quarter)** | -0.247 | 0.164 | -0.022 |
| **Bio19 (Precipitation of Coldest Quarter)** | -0.263 | -0.036 | 0.196 |
| **Standard Deviation** | 3.693 | 2.217 | 1.009 |
| **Proportion of Variance** | 0.682 | 0.246 | 0.051 |
| **Cumulative Proportion** | 0.682 | 0.928 | 0.979 |
